# Supplementary material for: Restructuring the built environment to change adult health behaviors: a scoping review integrated with behavior change frameworks
Source: PubMed Central journal article supplement (PMC6777541; doi:10.1080/23748834.2019.1574954), 2019-02-20
Supplement: RCAH_A_1574954_SM4464.pdf [file RCAH_A_1574954_SM4464.pdf]

| Author            | Date | Journal              | Study Location      | Study Type               | Theoretical Framework                      | Project Type                                                                                              | Study Aim(s)                                                                                | Sample                                                                                                                                                                                                | Method                                    | Measured Behaviour Change Outcome(s)                                                                                                                                                                  | Other Public Health Related Outcomes                                                                                                                                                                                                                                                                     | Main Findings                                                                                                                                                                                                                                                                                                                                                                                                                                                                                                                                                 | Gaps/recommendations                                                                                                                                                                                     |
|-------------------|------|----------------------|---------------------|--------------------------|--------------------------------------------|-----------------------------------------------------------------------------------------------------------|---------------------------------------------------------------------------------------------|-------------------------------------------------------------------------------------------------------------------------------------------------------------------------------------------------------|-------------------------------------------|-------------------------------------------------------------------------------------------------------------------------------------------------------------------------------------------------------|----------------------------------------------------------------------------------------------------------------------------------------------------------------------------------------------------------------------------------------------------------------------------------------------------------|---------------------------------------------------------------------------------------------------------------------------------------------------------------------------------------------------------------------------------------------------------------------------------------------------------------------------------------------------------------------------------------------------------------------------------------------------------------------------------------------------------------------------------------------------------------|----------------------------------------------------------------------------------------------------------------------------------------------------------------------------------------------------------|
| Branas et al.     | 2011 | Am Jn Epidem         | Philadelphia, USA   | Natural experiment       | Broken windows theory; Incivilities theory | Greening vacant lots                                                                                      | Assess programme for long term health effects                                               | State Household Health Survey, Vacant & matched control lots.                                                                                                                                         | Survey; Difference-in-difference analysis | Low exercise = less than 2 30-min. physical activity (PA) sessions/week                                                                                                                               | Diagnosed with high cholesterol/blood pressure by doctor; Stress (high - 10) in past year.                                                                                                                                                                                                               | Greening reduced stress and increased exercise. The impact on other health was mixed across locations.                                                                                                                                                                                                                                                                                                                                                                                                                                                        | The underlying reasons vacant lot greening impacts health is not clear. Recommend mixed methods including ethnographic methods.                                                                          |
| Brown et al.      | 2016 | J PhyAct Health      | Salt Lake City, USA | Natural experiment       | None listed                                | Light rail extension; Better/more complete cycle paths; Wider sidewalks; Improved aesthetics to sidewalks | Assess change in PA and commuting behaviour                                                 | Near (<800 m) and far (>800 m) to street renovation; English or Spanish; Able to walk a few blocks; 1 year pre-post (Pre N=910; Post N=536)                                                           | Survey; GPS; Accelerometer                | Transit & non-transit bike trip (time and distance)                                                                                                                                                   | --                                                                                                                                                                                                                                                                                                       | Residents living near to light rail increased active transportation from 20 to 25%. Those living far did not. Both groups reported increased walking. Increase in transit use was mostly by unmarried, nonwhite residents with no car. Cyclists more likely to be white males with no car.                                                                                                                                                                                                                                                                    | Some users lived far from the rail extension yet made the effort to access new transit options. Research should explore what characteristics encouraged this to identify facilitators of this behaviour. |
| Buscaill et al    | 2016 | BMC Pub Health       | Paris, France       | Quasi-experimental study | None mentioned                             | Pedestrian paths; Bike path; Widened sidewalks; Speed bumps                                               | Assess intervention impact on PA                                                            | Stratified random cluster sampling among dwellings; 2 years pre-post (Pre N = 199; post N = 217)                                                                                                      | Survey                                    | Meet World Health Organization recommended weekly MVPA (yes/no); overall, leisure, work location                                                                                                      | Barriers & levers to PA in location                                                                                                                                                                                                                                                                      | The number of residents reaching sufficient PA levels increased by 15%. Walking increased due to increased walking by women for leisure. Information campaigns combined with environment interventions successfully in raised some awareness of project but there were still opportunities to improve communication of PA opportunities in the area.                                                                                                                                                                                                          | --                                                                                                                                                                                                       |
| Calise et al 2013 | 2013 | Prev Chronic Disease | Austin, USA         | Natural Experiment       | None listed                                | New Urbanist Community                                                                                    | Change in PA post-move; Examined neighborhood preferences                                   | 1 adult per occupied household, free from mobility issues (N = 267). All data collected post-move. Pre-move data was retrospective self-report                                                        | Survey                                    | Total minutes PA/week; Total minutes transport related PA (cycle, walk)/week; Total minutes recreational cycle & walk/week; Total recreational PA (total walk/bike + other moderate-vigorous PA MVPA) | Neighbourhood ratings: affordability/value, closeness to open space/job/school/public transport/shops/services/recreational facilities/health care/entertainment choices, ease of walking, sense of community, school quality, motorway access                                                           | Most post-move PA was recreational. Recreational walking in the neighbourhood increased and outside the neighbourhood decreased post-move. Respondents reporting high levels of activity pre-move were still the most active. Significant increased post-move total and recreational PA were in pre-move low and moderate activity groups.                                                                                                                                                                                                                    | There was no exploration of reasons residents choose this community. Suggest future studies should use prospective design and explore individual differences.                                            |
| Chriqui et al.    | 2016 | Front Pub Hlth       | National, USA       | Planning analysis        | None listed                                | Pedestrian-oriented planning codes                                                                        | Investigate links between active travel and zoning (i.e. American Community planning) codes | 3914 jurisdictions in 48 states & DC; Survey respondents                                                                                                                                              | Policy review; Survey                     | Active travel (walking, bike, public transport) to work in last week; Any form of active transport to work                                                                                            | Walkability scale: 4-way intersections, intersection density, # intersections/land area, housing unit density, population density                                                                                                                                                                        | Overall, low reported levels of active travel. Zoning (i.e. planning) measures increased walking.                                                                                                                                                                                                                                                                                                                                                                                                                                                             | There is limited literature on the impact of zoning/planning and active health outcomes but the findings suggest it is an important means to effecting change.                                           |
| Christian et al.  | 2013 | AM J Pub Hlth        | Australia           | Natural Experiment       | None listed                                | "Livable" Neighborhoods                                                                                   | Determine impact of planning code implementation on walking                                 | English speaking; planned to relocate to either a livable, hybrid, or conventional neighbourhood; recruited from water authority (as part of move process). Pre move, 12 months, 36 months (N = 1047) | Survey                                    | Change in total weekly minutes of recreational, transport, & total walking                                                                                                                            | Neighbourhood perceptions: access to mixed-use services, street connectivity, traffic safety, crime safety, neighbourhood aesthetics. Neighbourhood selection reasons: pedestrian/cycle friendly streets, access to services/jobs/school, close to parks/recreational facilities, safe/diverse community | People chose livable or hybrid neighborhoods because of walkability characteristic. Transportation walking did not increase over time or differ between neighbourhoods. Recreational and total walking was higher in livable and hybrid neighbourhood residents. Walking in control neighbourhoods was high at baseline and did not increase; thus suggesting moving to livable or hybrid neighbourhoods had the intended effect. Residents of the livable neighbourhoods also viewed it more positively than control residents views of their neighbourhood. | Future studies should look at amount of planning code implemented and dose of exposure.                                                                                                                  |

|                 |      |                       |                         |                    |                            |                                                                                                |                                                                                                                                                              |                                                                                                                                                                                |                                                               |                                                                                                                                                                 |                                                                                                                                                              |                                                                                                                                                                                                                                                                                                                                                                                                                                                                                     |                                                                                                                                                                                                      |
|-----------------|------|-----------------------|-------------------------|--------------------|----------------------------|------------------------------------------------------------------------------------------------|--------------------------------------------------------------------------------------------------------------------------------------------------------------|--------------------------------------------------------------------------------------------------------------------------------------------------------------------------------|---------------------------------------------------------------|-----------------------------------------------------------------------------------------------------------------------------------------------------------------|--------------------------------------------------------------------------------------------------------------------------------------------------------------|-------------------------------------------------------------------------------------------------------------------------------------------------------------------------------------------------------------------------------------------------------------------------------------------------------------------------------------------------------------------------------------------------------------------------------------------------------------------------------------|------------------------------------------------------------------------------------------------------------------------------------------------------------------------------------------------------|
| Cohen et al.    | 2014 | Am J Pub Hlth         | Los Angeles, USA        | Natural Experiment | None listed                | New pocket parks                                                                               | Assess impact on PA; Compare PA levels between pocket and existing parks                                                                                     | Low SES, ethnic minority; Lived w/in 0.5 miles; Matched pocket park to control parks; Pre (N = 392); Post (N = 432)                                                            | Observations; Interviews; Survey (random sample)              | Park use; Observed MVPA; Estimated metabolic output of PA (METs); Self-reported PA in past week                                                                 | Cost effectiveness of park construction amortized over 30 years; \$ per METs hour per yr.                                                                    | Pocket parks users were often sedentary (e.g. observing children at play) but people walked to the park (average 0.25 miles). Pocket parks encouraged social interaction and were good value for investment.                                                                                                                                                                                                                                                                        | Programmes and events should be used to raise awareness of the new parks. Exercise classes which target MVPA could be held outdoors in these smaller locations.                                      |
| Crane et al.    | 2016 | Jn Trnsprt Hlth       | Sydney, Australia       | Natural Experiment | Theory of Planned Behavior | Installation of 2.4 km cycleway                                                                | Impact on cycling; Changes in perception, attitude                                                                                                           | Interviews Residents (N = 12) & Retailers (N = 13) 1 year pre-post; Cycleway Survey (N = 783)                                                                                  | Survey; Intercept interviews                                  | Cycleway use = purpose, time, origin, destination; Intention to use cycleway; Facilitators & barriers to use                                                    | Perceptions of: impact to health/leisure/commute behaviour/overall QoL/community connection                                                                  | People changed route to use new cycleway, which was primarily used for commuting. 18% of survey respondents were new users. Seeing people cycling influenced others to increase activity. Residents also perceived improved aesthetics and connection with neighbors. Conflict between cyclists & pedestrians occurred because road rules were not clearly communicated. Barriers to cycle path use were no bicycle, safety concerns, lack of awareness, and no cycling experience. | There were perceptions of the cycleway as a commuter route even though 1/3 of users were non-commuters. Attitudes towards cycling can also be barriers to use and should be explored.                |
| Dallat et al.   | 2014 | Eur Jn Pub Hlth       | Belfast, UK             | Natural Experiment | None listed                | Community Greenway                                                                             | Estimate potential health benefits & cost effectiveness using PREVENT model of annual costs for Type 2 diabetes, cardiovascular disease, colon/breast cancer | Household survey (N = 1209); 63% response rate                                                                                                                                 | Survey; Modeling                                              | PA (mins. per week); Proportion meeting 150 MVPA recommendation                                                                                                 | Gains in life expectancy (LE); Disability adjusted LE (DALE); Years lived with disability (YDL); Scenario modeling: A 2% inactive become active; B 5%, C 10% | All scenarios are cost-effective and reduce incidence and mortality, with scenario C the most effective. Incremental cost effectiveness ratios ranged £4469 to £18411 DALY. Modelled increased walking due to the project was predicted to have the most impact on preventing diabetes and ischemic heart conditions.                                                                                                                                                               | Intrapersonal and environmental factors must be explored. This should include subgroup analyses, particular with regard to low SES, to reduce health inequalities.                                   |
| Dill et al.     | 2014 | Prev Med              | Portland, USA           | Natural Experiment | None listed                | Bicycle boulevard installation                                                                 | Change in physical activity, active transport usage; Control of demographics & attitudes                                                                     | Family Activity Study; Able to cycle & have a bicycle (Pre N = 490; Post N = 353); 72% retention rate                                                                          | Survey; GPS; Accelerometer; Difference-in-difference analysis | Minutes MVPA based on GPS & accelerometer data                                                                                                                  | Attitudes towards cycling, walking, driving                                                                                                                  | Bike boulevard Installation did not increase MVP. Attitudes towards cycling did predict cycling behaviour.                                                                                                                                                                                                                                                                                                                                                                          | Time between completion of project and behaviour change should be considered. Boulevards varied in their design based on local needs and future studies should explore the effect of this variation. |
| Droomers et al. | 2016 | J Epidemiol Comm Hlth | Multi-site, Netherlands | Natural Experiment | None listed                | Varied (e.g. small parks, vacant lot conversion to large park, landscaping, path installation) | Impact of project on PA & perceived health                                                                                                                   | Dutch National Health Survey (Intervention neighbourhood N = 1018)                                                                                                             | Computer assisted personal or telephone interview             | Active at least once a week; Frequency & mins. per day walking, cycling, sports in last week                                                                    | Self-reported general health                                                                                                                                 | There were mixed findings. Walking increased overall but did not differ between intervention and control areas. The highest activity increases were in low SES areas with no environmental changes. Cycling increased in intervention locations but no impact on perceived general health.                                                                                                                                                                                          | Green interventions tailored to specific locations were reported precluding an evaluation of intervention types generally.                                                                           |
| Fitzhugh et al. | 2010 | Am J Prev Med         | Knoxville, USA          | Natural Experiment | None listed                | Urban greenway/trail to improve connectivity with schools/amenities                            | Assess intervention impact on PA                                                                                                                             | Public activity observations over 2 hour period; conducted in intervention & control neighbourhood; 6 months prior to construction; follow up observations up to 2 years later |                                                               | Counts of persons walking, cycling, other PA                                                                                                                    | --                                                                                                                                                           | Total PA increased post-intervention compared with control neighbourhoods.                                                                                                                                                                                                                                                                                                                                                                                                          | The study design specifically excluded the use of social marketing or awareness campaigns. Study design also precluded determining whether users were new or how they differed demographically.      |
| Goodman et al.  | 2013 | Soc Sci & Med         | Multi-site, England, UK | Natural Experiment | None listed                | "Cycling demonstration towns" and "Cycling Cities & Towns"                                     | Compared cycling to work in intervention towns with matched control towns; Change in walking, driving, public transportation use; Impact of deprivation      | Commuters in 18 towns (N = 1.3 million)                                                                                                                                        | National Census                                               | Cycling to work: Proportion reporting cycling as main transport mode; Prevalence of walking to work, commute by car/van/motorcycle; Pp public transport to work | --                                                                                                                                                           | Cycling to work in intervention towns increased by 0.69 percent; walking to work increased by 1.71 percent compared to control towns. Increased cycling was observed more in low SES areas and local initiatives may increase that impact.                                                                                                                                                                                                                                          | No randomization means limited to no causality conclusions; this is difficult to do but important to attempt in future studies.                                                                      |

|                  |      |                       |                             |                                           |                        |                                                                                                           |                                                                                                       |                                                                                                                                          |                            |                                                                                                                                          |                                                                                                                |                                                                                                                                                                                                                                                                                                         |                                                                                                                                                                                                                                                      |
|------------------|------|-----------------------|-----------------------------|-------------------------------------------|------------------------|-----------------------------------------------------------------------------------------------------------|-------------------------------------------------------------------------------------------------------|------------------------------------------------------------------------------------------------------------------------------------------|----------------------------|------------------------------------------------------------------------------------------------------------------------------------------|----------------------------------------------------------------------------------------------------------------|---------------------------------------------------------------------------------------------------------------------------------------------------------------------------------------------------------------------------------------------------------------------------------------------------------|------------------------------------------------------------------------------------------------------------------------------------------------------------------------------------------------------------------------------------------------------|
| Gustat et al.    | 2012 | Prev Chronic Disease  | New Orleans, USA            | Quasi-experimental study                  | None listed            | Installation of 8-foot wide walk paths to connect commercial corridor                                     | Determine change in physical activity                                                                 | Low SES, ethnic minority and control neighborhoods; Household stratified random sample; 2 years (pre - post) (Pre N = 449; Post N = 692) | Survey                     | Self-reported walking for leisure, transport, other PA; Observed number of persons sedentary, engaging in MPA or VPA                     | --                                                                                                             | There were observed increases in observed MPA and VPA in intervention area.                                                                                                                                                                                                                             | Decisions on where and how to provide opportunity for increased PA should include resident participation.                                                                                                                                            |
| Hooper et al.    | 2014 | Am J Hlth Prom        | Australia                   | Natural experiment; Policy implementation | None listed            | "Livable" Neighborhood Design                                                                             | Link between policy implementation & walking                                                          | Housing development residents (N = 594); 5-6 years post move                                                                             | Survey                     | Any walking, >60 mins. for transport and rec walking (4 variables)                                                                       | Policy implementation summed score across several areas                                                        | No area implemented all policy outcomes; on average only half were implemented. Each 10% increase in implementing movement network policies increased walking for transport by 2.48 (OR). Compliance with community design and lot layout elements increased active transport and recreational walking. | Need to ensure policy implementation is part of evaluation.                                                                                                                                                                                          |
| Longo et al.     | 2015 | Soc Sci & Med         | Belfast UK                  | Natural Experiment                        | None listed            | Community Greenway                                                                                        | Determine neighbourhood improvements impact on walking; Determine monetary value of increased walking | Household survey; adults (N=1209; 63% response rate)                                                                                     | In-person Interview        | Minutes walking in/outside of neighborhood per week; Mins MVPA per day                                                                   | Health-related quality of life; Objective walkability; safety/walking paths/local shops; Perceived walkability | Residents perception of "good availability of shops" resulted in 36.48 more minutes walking each week. The authors estimate improving perceptions of inactive respondents could improve PA by 35%                                                                                                       | Researchers need information on monetary health benefits. The WHO HEAT model underestimated total value of walking compared to implemented model. Future studies should focus on transitioning inactive residents to meeting recommended guidelines. |
| Miller et al.    | 2015 | Health & Place        | Salt Lake City, USA         | Natural experiment                        | None listed            | Light rail extension; better/more complete cycle paths; wider sidewalks; improved aesthetics to sidewalks | Explore if travel to new transit stations replaces other physical activity                            | Door to door canvassing; must be able to walk 2+ blocks; 1 year pre-post (N = 536)                                                       | Survey; GPS; Accelerometer | Light to moderate transit PA (min 5 mins. duration with min 1000 accelerometer counts per min); Moderate to Vigorous PA (MVPA); Total PA | Public transit use: never, continued (from before intervention), new, former                                   | Public transit generates new PA, especially light rail compared to bus. Total PA increased for new users but decreased for former public transit users. Diversity and density of activities around transit shops should be considered.                                                                  | Public health should be part of transit planning.                                                                                                                                                                                                    |
| Morrison et al.  | 2004 | J Epidemiol Comm Hlth | Glasgow, UK                 | Natural experiment                        | None listed            | Traffic calming measure on main road of deprived                                                          | Assess scheme impact                                                                                  | Random sample from households (N = 185)                                                                                                  | Survey; Observation        | Observed walking                                                                                                                         | Health-related quality of life                                                                                 | Observed pedestrian activity increased and reported physical health-related quality of life also improved.                                                                                                                                                                                              | It is important to consider the health and social impacts of built environment interventions in addition to evaluating original project delivery aims.                                                                                               |
| Panter et al.    | 2016 | Am J Prev Med         | Cambridge, UK               | Natural Experiment                        | None listed            | Busway Intervention                                                                                       | Explore change over time                                                                              | Worked in city on busway; Lived w/in 30km (N = 469 at 1 year post-opening follow up)                                                     | Annual survey              | Travel modes used in last week; Total weekly time walk/cycle for recreation/commute; Total time recreation MVPA; Total time overall PA   | --                                                                                                             | Closer exposure to busway increased cycle commuting time (mean = 87 mins. per week) but did not impact walking, total recreational, or overall PA.                                                                                                                                                      | Natural experiments are crucial to the evidence base between infrastructure changes, policymaking, and health.                                                                                                                                       |
| Rodriguez et al. | 2006 | J Am Plan Assoc       | Chapel Hill & Carrboro, USA | Natural Experiment                        | Socio-ecological Model | New Urbanist Community Design                                                                             | Relationship between new urban neighborhood & PA                                                      | Head of households; Matched communities (N = 370)                                                                                        | Survey                     | Total MVPA; Meet recommended MVPA per week (yes/no); Inactivity                                                                          | PA by location (home, neighborhood, outside neighborhood); Travel diary: time, destination, mode, distance,    | There were no differences in MVPA between new urbanist or traditional neighbourhood residents. New urbanist residents engaged in more PA <i>within their neighbourhood</i> . Travel diaries suggested more walking and cycling in new urban neighborhoods, as well as reduced car use.                  | "Time budgets" for PA are an important factor to consider as people may not have more time to complete PA despite increased built environment provision. This may result in a substitute effect where PA in one context replaces another.            |

|                         |      |                     |                        |                                 |                                 |                                                                                                                 |                                                                                                               |                                                                                                                     |                          |                                                                                                                                                                                           |                                                                                                                                                   |                                                                                                                                                                                                                                                                                                                                                                                      |                                                                                                                                                                       |
|-------------------------|------|---------------------|------------------------|---------------------------------|---------------------------------|-----------------------------------------------------------------------------------------------------------------|---------------------------------------------------------------------------------------------------------------|---------------------------------------------------------------------------------------------------------------------|--------------------------|-------------------------------------------------------------------------------------------------------------------------------------------------------------------------------------------|---------------------------------------------------------------------------------------------------------------------------------------------------|--------------------------------------------------------------------------------------------------------------------------------------------------------------------------------------------------------------------------------------------------------------------------------------------------------------------------------------------------------------------------------------|-----------------------------------------------------------------------------------------------------------------------------------------------------------------------|
| Scott et al.            | 2014 | Hilh Prom<br>Jn Aus | Australia              | Quasi-<br>experimental<br>study | None listed                     | Outdoor gym                                                                                                     | Evaluate<br>intervention<br>effectiveness;<br>Explore impact of<br>marketing and social<br>support programmes | Session attendees:<br>Mostly 50+; Sessions<br>over 8 weeks (N = 66;<br>50% response rate )                          | Survey                   | Change in use;<br>Confidence in using<br>gym; Barriers &<br>facilitators to use;<br>Intended future use                                                                                   | --                                                                                                                                                | The outdoor gym and instruction<br>sessions attracted new users and<br>increased confidence. Instructor<br>sessions were an important facilitator<br>and the guide to using the equipment<br>could supported continued use. The<br>intervention was more effective for<br>older women than men. Advertising<br>and 'walking past' while activities<br>taking place raised awareness. | Equipment installation should be<br>appropriate for older adults, with<br>a mix of types (e.g. aerobic,<br>balance, strength) and near to<br>other PA infrastructure. |
| Ward Thompson et<br>al. | 2014 | Br J Sports<br>Med  | UK excl. N.<br>Ireland | Natural<br>Experiment           | Social-<br>ecological<br>Theory | Sustran Livable<br>Neighborhoods<br>DIY Streets<br>(planters, parking<br>provision changes,<br>traffic calming) | Change in physical<br>activity                                                                                | Intervention &<br>comparison street<br>across 9 sites; 3-6<br>months post<br>intervention (N = 61;<br>est. 50% pop) | Survey;<br>Accelerometer | PA intensity<br>(counts/minute);<br>Frequency of outdoor<br>visits; Typical time<br>spent outdoors for<br>necessary<br>walking/recreational<br>walking/other outdoor<br>activities; EQ-5D | Quality of life; Health-<br>related quality of life;<br>Neighbourhood<br>perceptions; Change in<br>social connections;<br>Reported unhealthy days | Attractive and easy access open space<br>influences elderly activity. The<br>intervention group felt it was easier to<br>walk on their street but did not report<br>being more active, possibly due to<br>declining health.                                                                                                                                                          | The potential for interventions to<br>negatively impact activity (e.g.<br>lack of car parking space) should<br>be considered.                                         |
| Zhu et al.              | 2014 | Prev Med            | Austin, USA            | Natural<br>Experiment           | Social-<br>ecological<br>Theory | New Urbanist<br>Community<br>Design                                                                             | Pre-post<br>(retrospective)<br>change in PA, social<br>cohesion, variation<br>by subgroup                     | Occupied housing units<br>(N = 449); 36.3%<br>response rate)                                                        | Survey                   | Days per week 30<br>mins. MPA; Cycling<br>(mins./week); Total<br>walking (mins./week);<br>Walking in<br>community<br>(mins./week); Car<br>travel (mins./week)                             | Social interaction<br>frequency; Social<br>cohesion; Walkability                                                                                  | The change in PA was for mostly<br>people moving from low walkable<br>areas to new area. Social interaction<br>and cohesion increased.                                                                                                                                                                                                                                               | Longitudinal studies with control<br>groups should be implemented if<br>possible.                                                                                     |

PA = Physical activity; MVPA = Moderate-to-vigorous physical activity; MPA = Moderate physical activity; VPA = Vigorous physical activity
